# Supplementary material for: Preventive Effects of Bee Venom Derived Phospholipase A2 on Oxaliplatin-Induced Neuropathic Pain in Mice
Source: MDPI journal article supplement (doi:10.3390/toxins8010027), 2016-01-19
Supplement: s1 [file s1]

## Supplementary Materials: Preventive Effects of Bee Venom Derived Phospholipase A<sub>2</sub> on Oxaliplatin-Induced Neuropathic Pain in Mice

Dongxing Li, Woojin Kim, Dasom Shin, Yongjae Jung, Hyunsu Bae <sup>1</sup> and Sun Kwang Kim

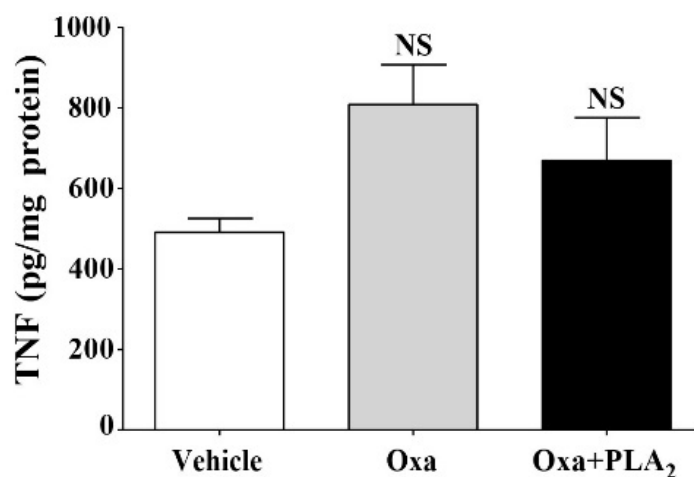

**Figure S1.** Effect of Bee Venom (BV) derived phospholipase A<sub>2</sub> (bvPLA<sub>2</sub>) pre-treatment on the pro-inflammatory cytokine, TNF- $\alpha$  in the lumbar dorsal root ganglia (DRG). TNF- $\alpha$  concentrations in the lumbar DRG were measured by sandwich ELISA ( $n = 4$  mice/group). Results are expressed as mean  $\pm$  SEM; The data was analyzed with one-way analysis of variance (ANOVA) followed by the Tukey's multiple comparison test. NS, no significance ( $p > 0.05$ ).
